# Supplementary material for: Time trends of cardiovascular risk management in type 1 diabetes - nationwide analyses of real-life data
Source: PubMed Central journal article supplement (PMC9685843; doi:10.1186/s12933-022-01692-5), 2022-11-23

non-LLD users

LLD users

Proportions of subjects

1.00  
0.75  
0.50  
0.25  
0.00

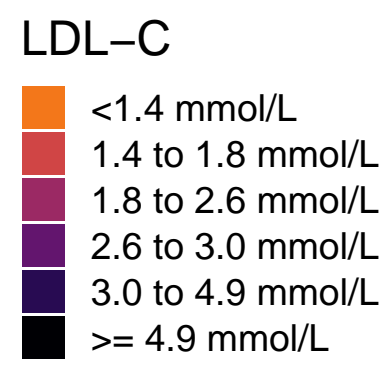

2010 2011 2012 2013 2014 2015 2016 2017 2010 2011 2012 2013 2014 2015 2016 2017

Year

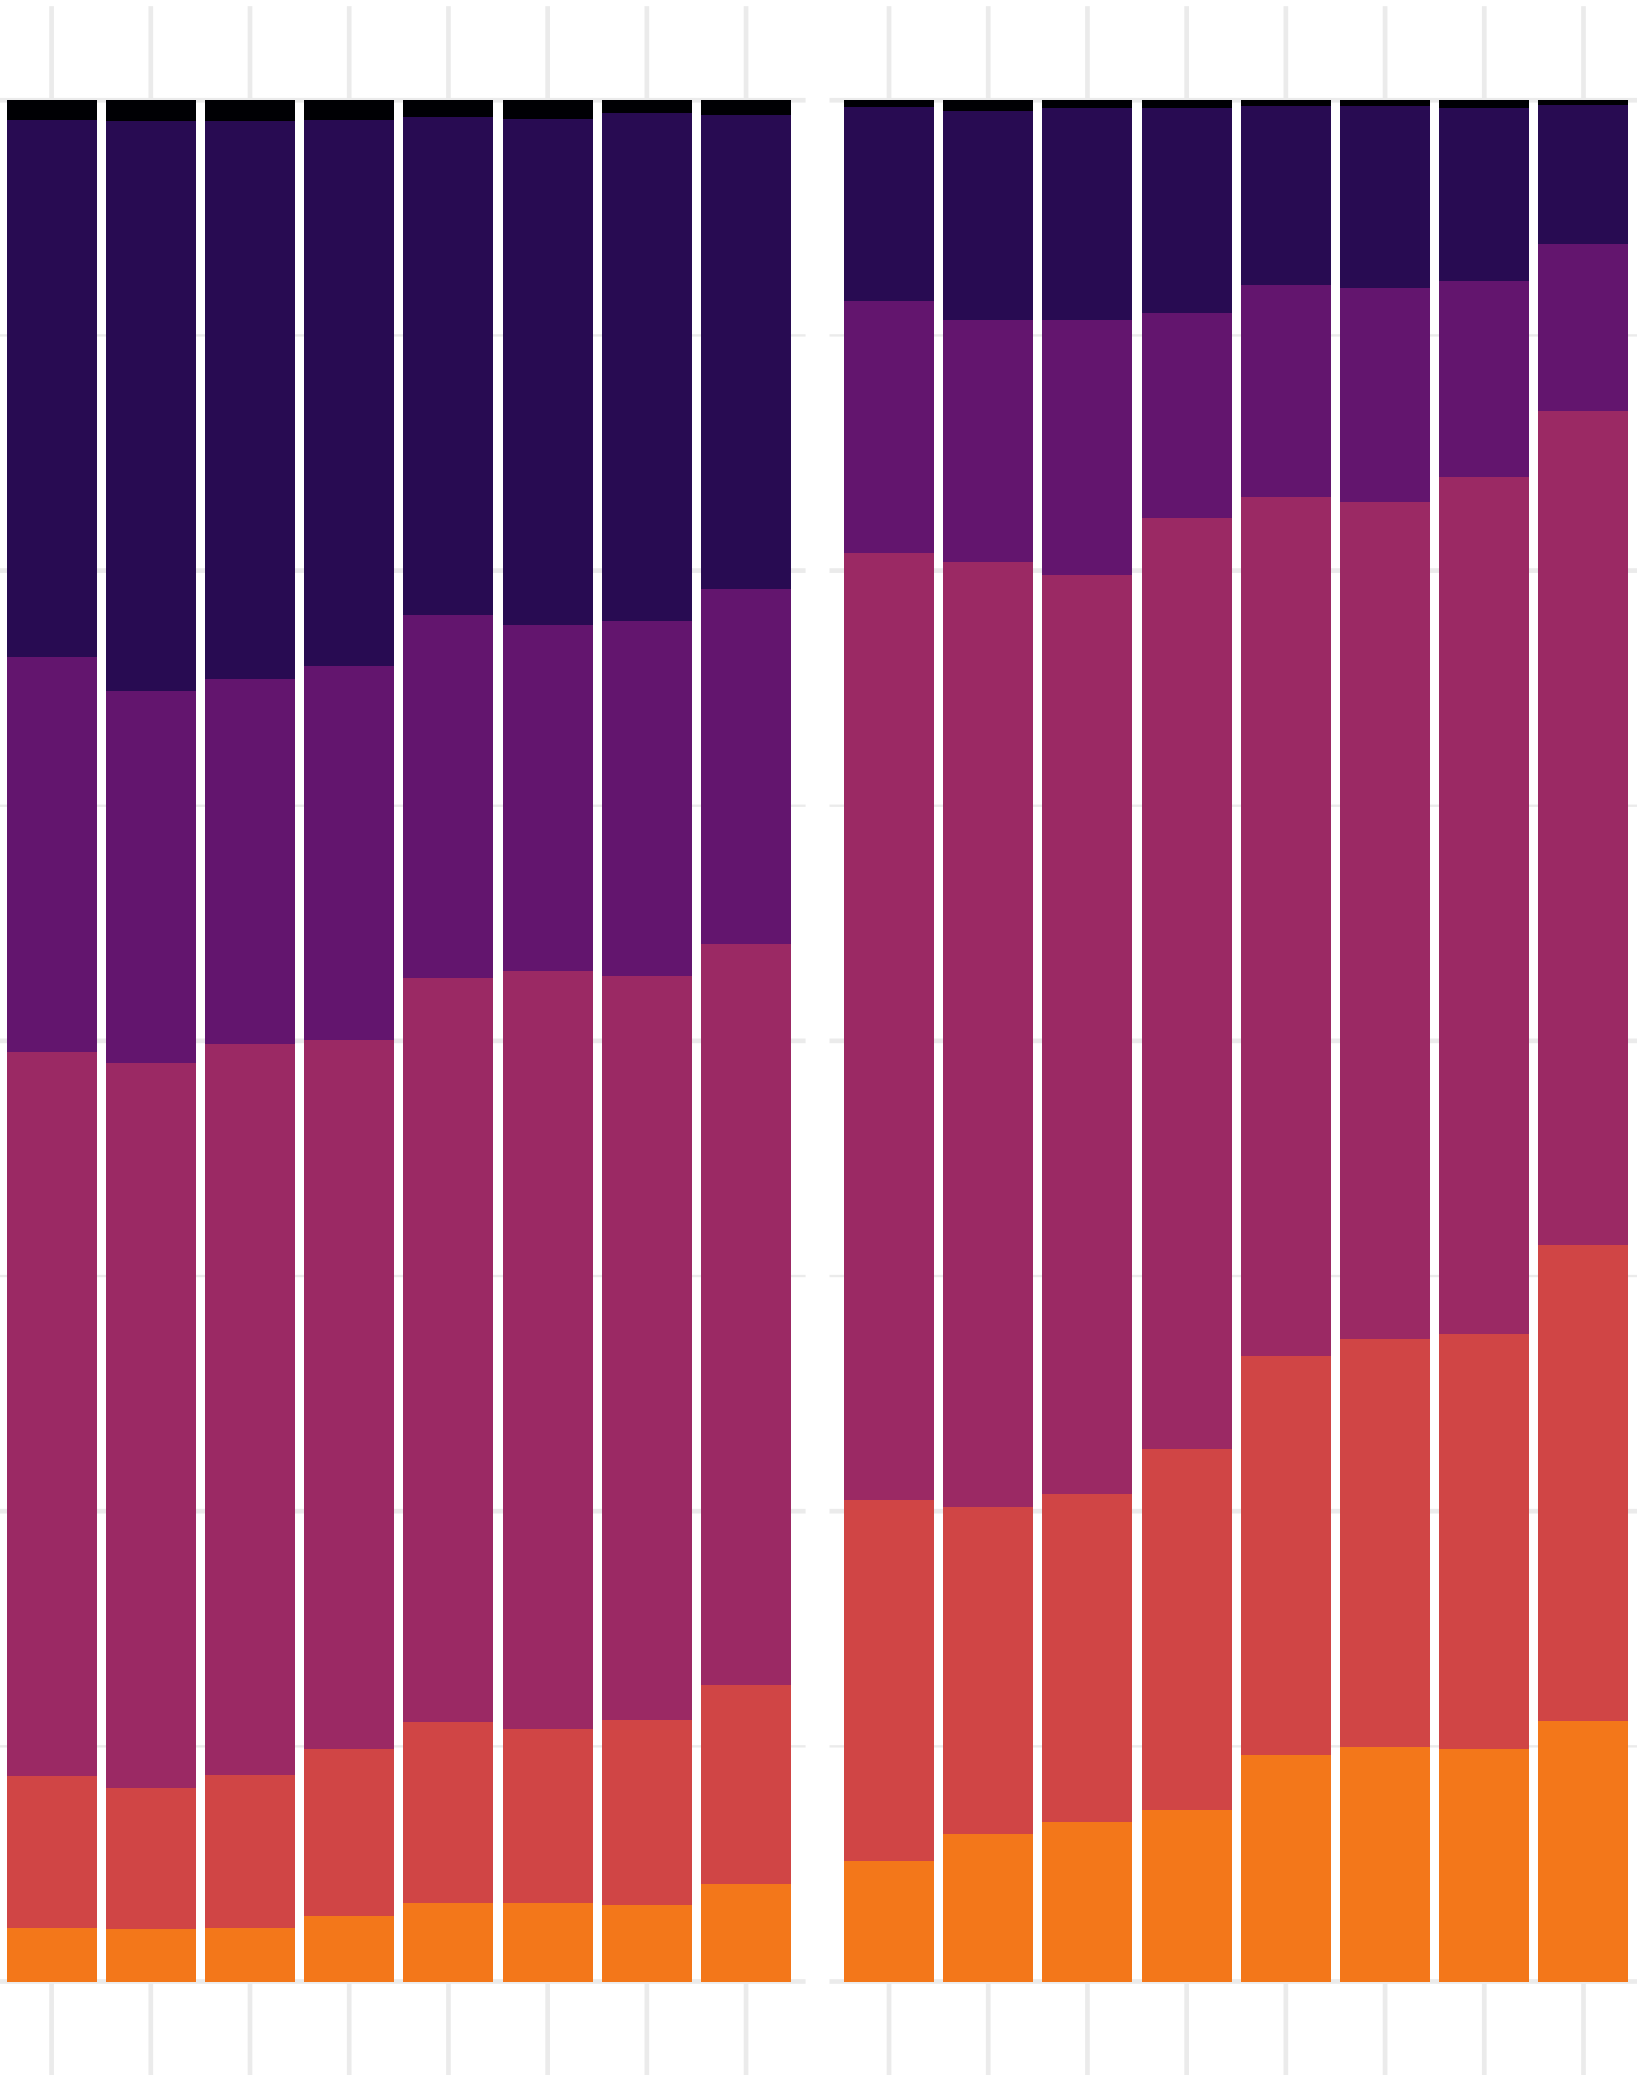

Supplement: 12933_2022_1692_MOESM1_ESM.pdf [file 12933_2022_1692_MOESM1_ESM.pdf]
