# Supplementary material for: Time trends of cardiovascular risk management in type 1 diabetes - nationwide analyses of real-life data
Source: PubMed Central journal article supplement (PMC9685843; doi:10.1186/s12933-022-01692-5), 2022-11-23
Supplement: 12933_2022_1692_MOESM2_ESM.pdf [file 12933_2022_1692_MOESM2_ESM.pdf]

non-AHD user

AHD user

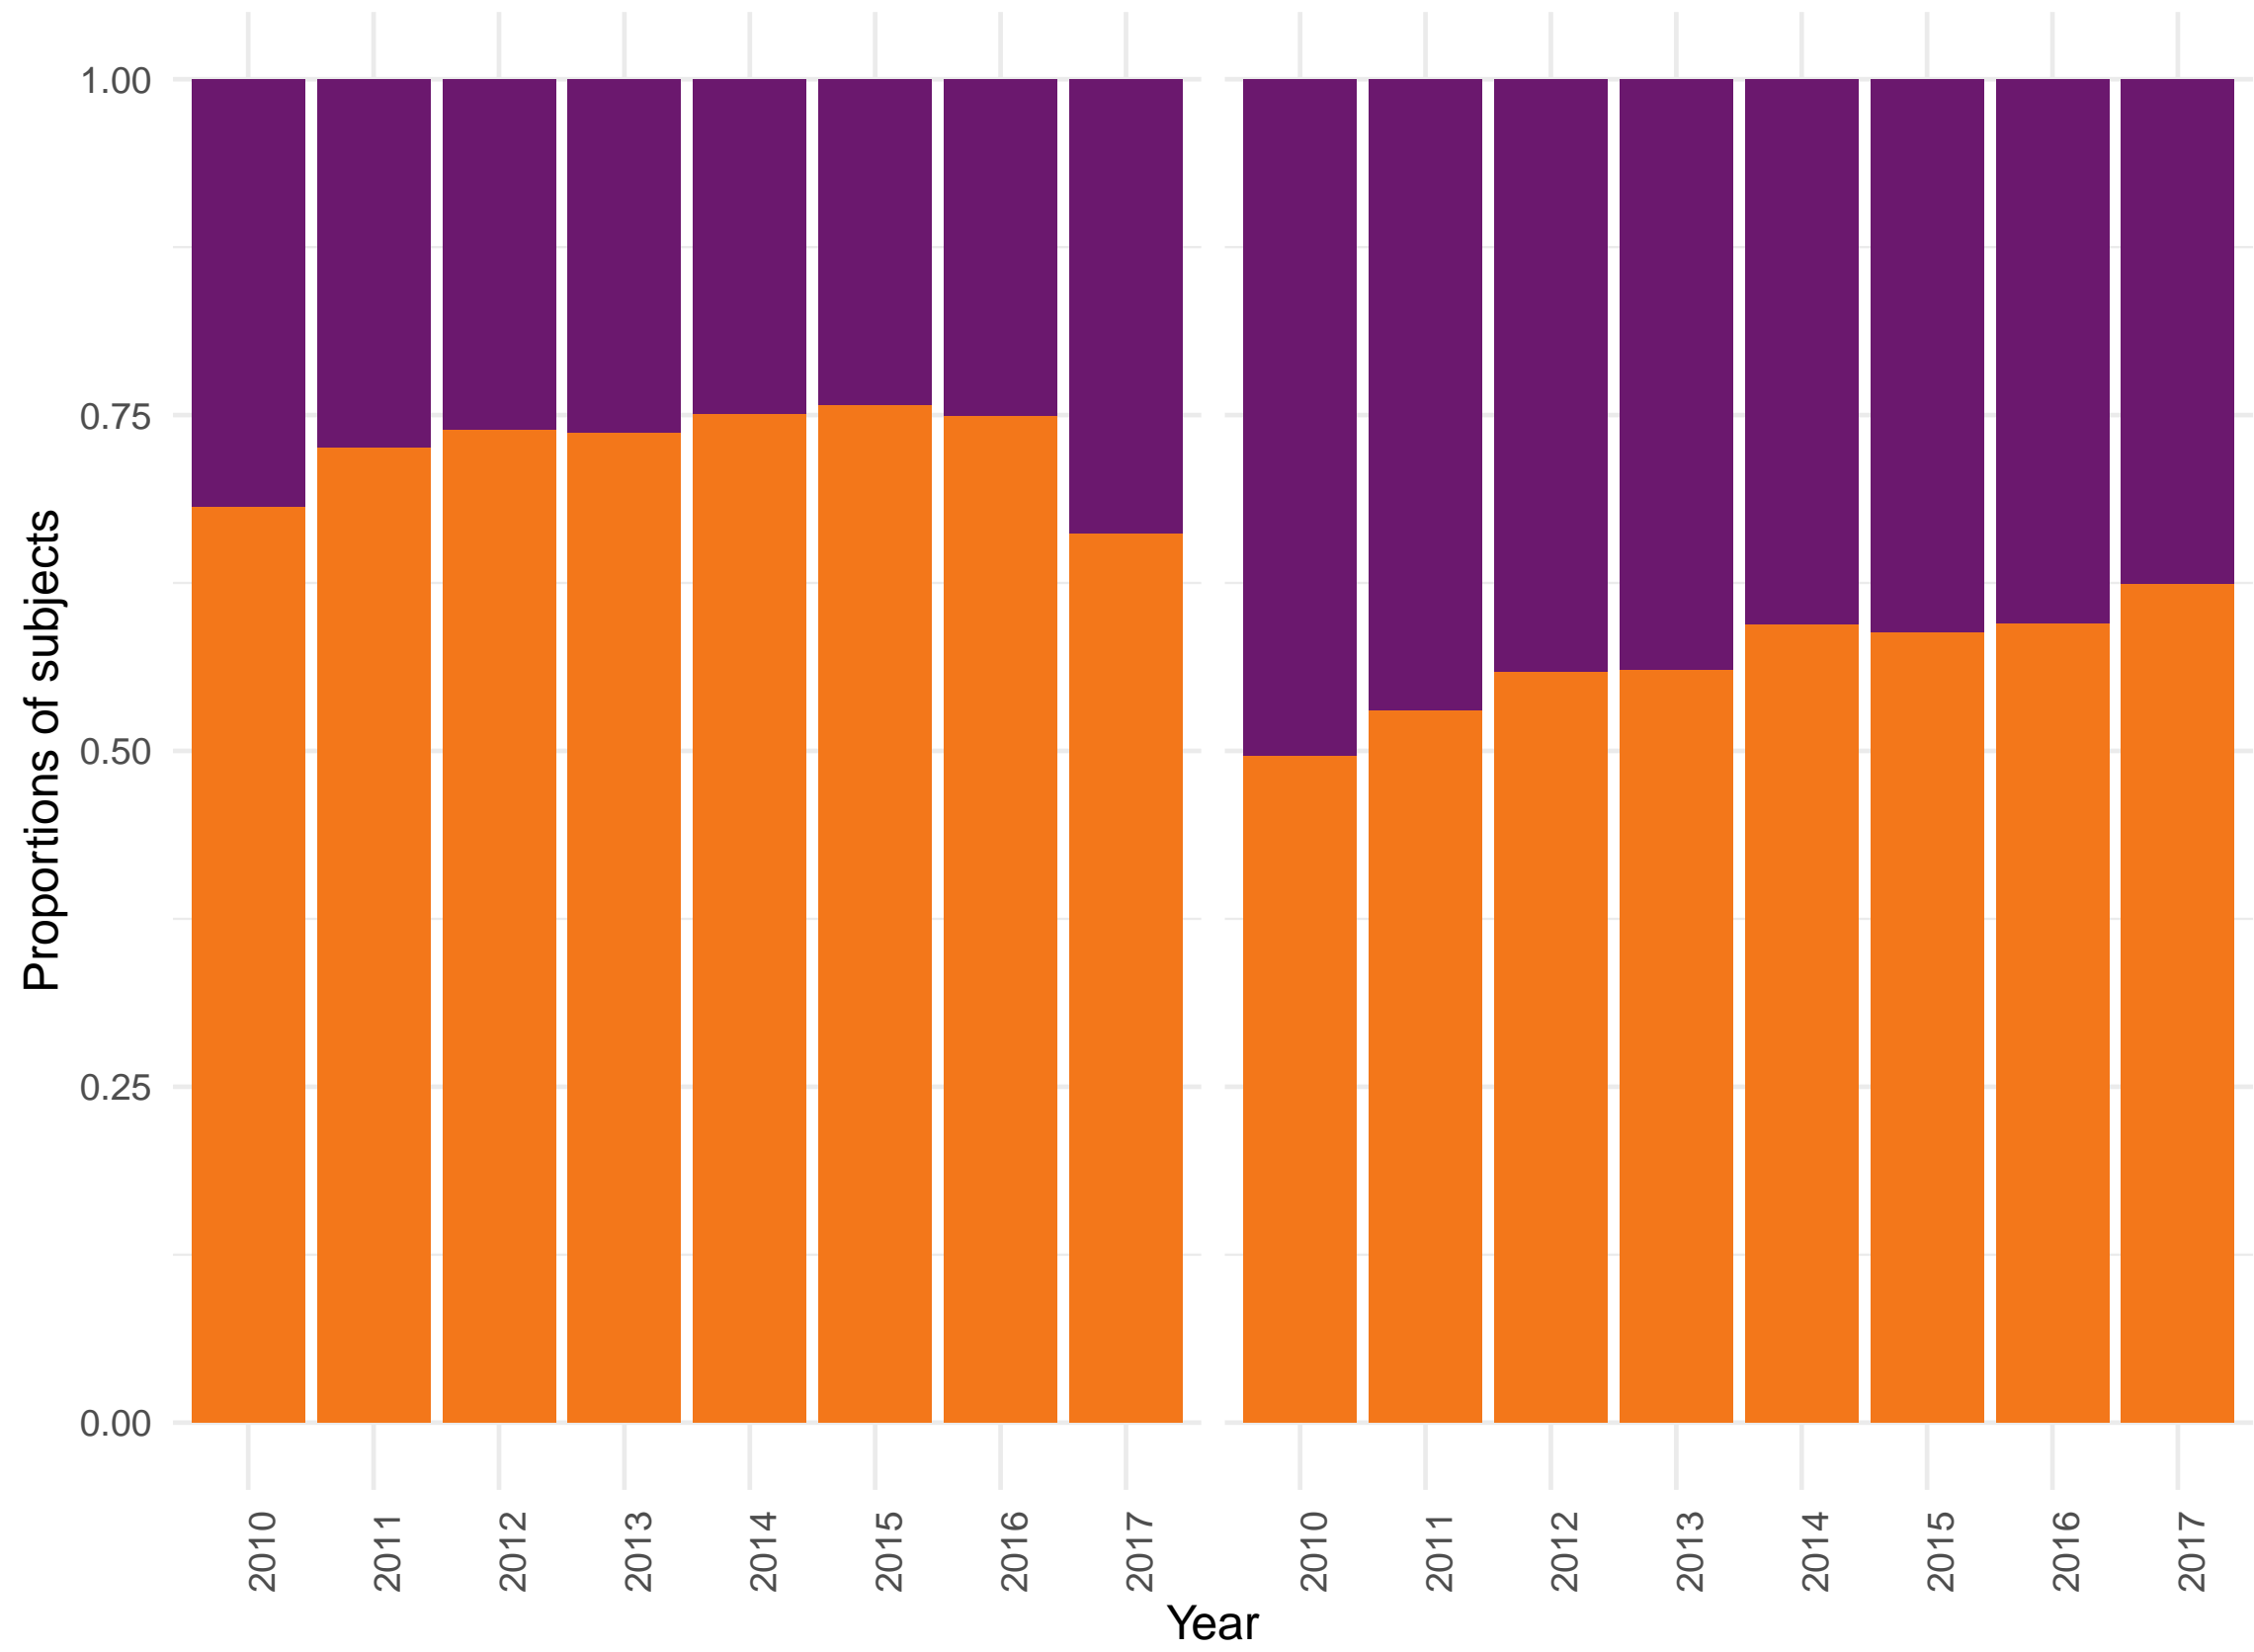

Blood pressure ■ Systolic < 140 and Diastolic < 85 mmHg ■ Otherwise
